# Supplementary material for: Theabrownin from Pu-erh tea attenuates hypercholesterolemia via modulation of gut microbiota and bile acid metabolism
Source: PubMed Central journal article supplement (PMC6823360; doi:10.1038/s41467-019-12896-x), 2019-10-31
Supplement: 41467_2019_12896_MOESM2_ESM.pdf [file 41467_2019_12896_MOESM2_ESM.pdf]

## Reporting Summary

Nature Research wishes to improve the reproducibility of the work that we publish. This form provides structure for consistency and transparency in reporting. For further information on Nature Research policies, see [Authors & Referees](#) and the [Editorial Policy Checklist](#).

### Statistics

For all statistical analyses, confirm that the following items are present in the figure legend, table legend, main text, or Methods section.

n/a Confirmed

- |                                     |                                     |                                                                                                                                                                                                                                                            |
|-------------------------------------|-------------------------------------|------------------------------------------------------------------------------------------------------------------------------------------------------------------------------------------------------------------------------------------------------------|
| <input type="checkbox"/>            | <input checked="" type="checkbox"/> | The exact sample size ( $n$ ) for each experimental group/condition, given as a discrete number and unit of measurement                                                                                                                                    |
| <input type="checkbox"/>            | <input checked="" type="checkbox"/> | A statement on whether measurements were taken from distinct samples or whether the same sample was measured repeatedly                                                                                                                                    |
| <input type="checkbox"/>            | <input checked="" type="checkbox"/> | The statistical test(s) used AND whether they are one- or two-sided<br><i>Only common tests should be described solely by name; describe more complex techniques in the Methods section.</i>                                                               |
| <input checked="" type="checkbox"/> | <input type="checkbox"/>            | A description of all covariates tested                                                                                                                                                                                                                     |
| <input checked="" type="checkbox"/> | <input type="checkbox"/>            | A description of any assumptions or corrections, such as tests of normality and adjustment for multiple comparisons                                                                                                                                        |
| <input type="checkbox"/>            | <input checked="" type="checkbox"/> | A full description of the statistical parameters including central tendency (e.g. means) or other basic estimates (e.g. regression coefficient) AND variation (e.g. standard deviation) or associated estimates of uncertainty (e.g. confidence intervals) |
| <input type="checkbox"/>            | <input checked="" type="checkbox"/> | For null hypothesis testing, the test statistic (e.g. $F$ , $t$ , $r$ ) with confidence intervals, effect sizes, degrees of freedom and $P$ value noted<br><i>Give <math>P</math> values as exact values whenever suitable.</i>                            |
| <input checked="" type="checkbox"/> | <input type="checkbox"/>            | For Bayesian analysis, information on the choice of priors and Markov chain Monte Carlo settings                                                                                                                                                           |
| <input type="checkbox"/>            | <input checked="" type="checkbox"/> | For hierarchical and complex designs, identification of the appropriate level for tests and full reporting of outcomes                                                                                                                                     |
| <input type="checkbox"/>            | <input checked="" type="checkbox"/> | Estimates of effect sizes (e.g. Cohen's $d$ , Pearson's $r$ ), indicating how they were calculated                                                                                                                                                         |

*Our web collection on [statistics for biologists](#) contains articles on many of the points above.*

### Software and code

Policy information about [availability of computer code](#)

Data collection MassLynx v4.1 and TargetLynex v4.1 (Waters, Milford, MA) were used for data collection in the manuscript

Data analysis GraphPad Prism 6.0 (GraphPad Software, San Diego, USA), SPSS 20.0 (IBM SPSS, USA) were used for statistical analyses and graphic generation.

For manuscripts utilizing custom algorithms or software that are central to the research but not yet described in published literature, software must be made available to editors/reviewers. We strongly encourage code deposition in a community repository (e.g. GitHub). See the Nature Research [guidelines for submitting code & software](#) for further information.

### Data

Policy information about [availability of data](#)

All manuscripts must include a [data availability statement](#). This statement should provide the following information, where applicable:

- Accession codes, unique identifiers, or web links for publicly available datasets
- A list of figures that have associated raw data
- A description of any restrictions on data availability

The data that support the findings of this study are available from the corresponding author upon reasonable request. The source data underlying Figs. 1-7 and Supplementary Figs. 2-14 are provided as a Source Data file. The 16S rRNA gene sequences and metagenomic sequences were provided and available at NCBI Sequence Read Archive (SRP) repository with accession code SRP221307 [<https://trace.ncbi.nlm.nih.gov/sra/?term=SRP221307>], SRP221311 [<https://trace.ncbi.nlm.nih.gov/sra/?term=SRP221311>], SRP221451 [<https://trace.ncbi.nlm.nih.gov/sra/?term=SRP221451>], SRP221525 [<https://trace.ncbi.nlm.nih.gov/sra/?term=SRP221525>], SRP221313 [<https://trace.ncbi.nlm.nih.gov/sra/?term=SRP221313>], SRP221862 [<https://trace.ncbi.nlm.nih.gov/sra/?term=SRP221862>]. The metabolomics data were deposited and available at Metabolights repository with accession code MTBLS1259 [[www.ebi.ac.uk/metabolights/MTBLS1259](http://www.ebi.ac.uk/metabolights/MTBLS1259)].

## Field-specific reporting

Please select the one below that is the best fit for your research. If you are not sure, read the appropriate sections before making your selection.

- Life sciences     Behavioural & social sciences     Ecological, evolutionary & environmental sciences

For a reference copy of the document with all sections, see [nature.com/documents/nr-reporting-summary-flat.pdf](https://nature.com/documents/nr-reporting-summary-flat.pdf)

## Life sciences study design

All studies must disclose on these points even when the disclosure is negative.

|                 |                                                                                                                                                                                                                                                                                                                             |
|-----------------|-----------------------------------------------------------------------------------------------------------------------------------------------------------------------------------------------------------------------------------------------------------------------------------------------------------------------------|
| Sample size     | Sample sizes of all studies were predetermined by the software GPower before experiments. The sample sizes are all larger than the predetermined ones when the powers are set as 0.85 (significant level 0.05, two tails, $n1=n2$ for Mann Whitney U test and Wilcoxon signed-rank test) and the effect size is set as 0.8. |
| Data exclusions | No data were excluded from the analyses.                                                                                                                                                                                                                                                                                    |
| Replication     | We have verify the reproducibility of experimental findings. These results were verified by the human ( $n>10$ ), animal ( $n=5-8$ /group) and cell ( $n>3$ ) studies involved in the manuscripts.                                                                                                                          |
| Randomization   | Human samples were allocated into groups according to clinical diagnostic criteria. Animals were grouped randomly. Detailed definitions and descriptions were provided in the manuscript.                                                                                                                                   |
| Blinding        | The investigators were blinded to the group allocation during data collection and the instrument running order was randomized. Investigators responsible for data analysis and manuscript preparation know the group allocation.                                                                                            |

## Reporting for specific materials, systems and methods

We require information from authors about some types of materials, experimental systems and methods used in many studies. Here, indicate whether each material, system or method listed is relevant to your study. If you are not sure if a list item applies to your research, read the appropriate section before selecting a response.

### Materials & experimental systems

| n/a                                 | Involved in the study                                           |
|-------------------------------------|-----------------------------------------------------------------|
| <input type="checkbox"/>            | <input checked="" type="checkbox"/> Antibodies                  |
| <input type="checkbox"/>            | <input checked="" type="checkbox"/> Eukaryotic cell lines       |
| <input checked="" type="checkbox"/> | <input type="checkbox"/> Palaeontology                          |
| <input type="checkbox"/>            | <input checked="" type="checkbox"/> Animals and other organisms |
| <input type="checkbox"/>            | <input checked="" type="checkbox"/> Human research participants |
| <input checked="" type="checkbox"/> | <input type="checkbox"/> Clinical data                          |

### Methods

| n/a                                 | Involved in the study                           |
|-------------------------------------|-------------------------------------------------|
| <input checked="" type="checkbox"/> | <input type="checkbox"/> ChIP-seq               |
| <input checked="" type="checkbox"/> | <input type="checkbox"/> Flow cytometry         |
| <input checked="" type="checkbox"/> | <input type="checkbox"/> MRI-based neuroimaging |

## Antibodies

|                 |                                                                                                                                                                                                                                                                                                                                                           |
|-----------------|-----------------------------------------------------------------------------------------------------------------------------------------------------------------------------------------------------------------------------------------------------------------------------------------------------------------------------------------------------------|
| Antibodies used | FXR (Abcam, ab28480), FXR (Biorbyt, orb156973), FGF15 (Santa Cruz, sc398338), FGF19 (Abcam, ab85042), SHP (Abcam, ab186874), CYP7A1 (Abcam, ab65596), CYP8B1 (Abcam, ab191910), CYP27A1 (Abcam, ab126785), CYP7B1 (Abcam, ab138497), $\beta$ -Actin (CST, 4970S), Lamin B1 (Beyotime, AF1408), anti-mouse IgG (CST, 7076S), anti-rabbit IgG (CST, 7074S). |
| Validation      | The antibodies used in our study are for western-blot (WB) and immunofluorescence (IF) staining. The quality of the antibodies are all guaranteed by the manufacturers, and we further validated the antibody in varied assays for WB and IF detection.                                                                                                   |

## Eukaryotic cell lines

Policy information about [cell lines](#)

|                                                                   |                                                                                                                                                                                                     |
|-------------------------------------------------------------------|-----------------------------------------------------------------------------------------------------------------------------------------------------------------------------------------------------|
| Cell line source(s)                                               | Human intestine FHs 74 Int cell line was purchased from American Type Culture Collection (ATCC). Human liver L02 cell line was purchased from Type Culture Collection of Chinese Academy of Science |
| Authentication                                                    | The authentication is guaranteed by ATCC and Type Culture Collection of Chinese Academy of Science                                                                                                  |
| Mycoplasma contamination                                          | The cell lines were tested negative for mycoplasma contamination.                                                                                                                                   |
| Commonly misidentified lines (See <a href="#">ICLAC</a> register) | No misidentified lines were used in this study.                                                                                                                                                     |

## Animals and other organisms

Policy information about [studies involving animals](#); [ARRIVE guidelines](#) recommended for reporting animal research

|                         |                                                                                                                                                                                     |
|-------------------------|-------------------------------------------------------------------------------------------------------------------------------------------------------------------------------------|
| Laboratory animals      | C57BL/6J male mice at the age of four weeks were involved in this study.                                                                                                            |
| Wild animals            | The study did not involve wild animals.                                                                                                                                             |
| Field-collected samples | All the mice were maintained in a specific-pathogen-free (SPF) environment with controlled conditions of a 12 h light/dark cycle at 20-22 °C and 45 ± 5% humidity.                  |
| Ethics oversight        | All animal procedures were performed according to the national legislation and local guidelines of the Laboratory Animals Center at Shanghai Jiao Tong University, Shanghai, China. |

Note that full information on the approval of the study protocol must also be provided in the manuscript.

## Human research participants

Policy information about [studies involving human research participants](#)

|                            |                                                                                                                                                                                                                                                                                                                                                                                                  |
|----------------------------|--------------------------------------------------------------------------------------------------------------------------------------------------------------------------------------------------------------------------------------------------------------------------------------------------------------------------------------------------------------------------------------------------|
| Population characteristics | Thirteen healthy male volunteers at the age ranged from 24 to 32 years old were enrolled in this study.                                                                                                                                                                                                                                                                                          |
| Recruitment                | Written informed consent was obtained from all the subjects before study initiation. All volunteers were provided with standard meals three times a day for a week before tea intervention and subsequently received 300 mL of tea infusion at 8:00 and 20:00 after standard meals for 4 weeks at a dose of 50 mg/kg/day. No other diets or drinks were consumed during the experimental period. |
| Ethics oversight           | This study was conducted in accordance with the established ethical guidelines and approved by the research ethics committee of the School of Pharmacy, Shanghai Jiao Tong University, Shanghai, China.                                                                                                                                                                                          |

Note that full information on the approval of the study protocol must also be provided in the manuscript.
